# Supplementary material for: DNA5mC Regulator-Mediated Molecular Clusters and Tumor Microenvironment Signatures in Glioblastoma
Source: Front Cell Dev Biol. 2022 Nov 8;10:1055567. doi: 10.3389/fcell.2022.1055567 (PMC9679379; doi:10.3389/fcell.2022.1055567)
Supplement: Supplementary file 1 [file Table2.XLSX]

## Sheet: Sheet1
SampleID	CancerType	B.cells.naive	B.cells.memory	Plasma.cells	T.cells.CD8	T.cells.CD4.naive	T.cells.CD4.memory.resting	T.cells.CD4.memory.activated	T.cells.follicular.helper	T.cells.regulatory..Tregs.	T.cells.gamma.delta	NK.cells.resting	NK.cells.activated	Monocytes	Macrophages.M0	Macrophages.M1	Macrophages.M2	Dendritic.cells.resting	Dendritic.cells.activated	Mast.cells.resting	Mast.cells.activated	Eosinophils	Neutrophils	P.value	Correlation	RMSE
TCGA.32.1970.01A.01R.1850.01	GBM	0.00721704	0	0	0.0727113	0	0.156809	0	0.062176	0.00948147	0	0.0606191	0	0.0586435	0	0.0121015	0.383612	0	0.00467593	0.120069	0	0.0263369	0.0255471	0.126	0.0832417	1.04844
TCGA.28.5218.01A.01R.1850.01	GBM	0.0309637	0	0.00359209	0.163413	0	0	0.024739	0.0859054	0.0217582	0	0.0156181	0	0.0217619	0.157993	0.0207277	0.437185	0	0	0	0	0	0.0163426	0.044	0.164381	1.0329
TCGA.19.2619.01A.01R.1850.01	GBM	0	0.0202937	0	0.0242911	0	0.0954306	0	0.0588543	0.0192593	0	0.166905	0.00070927	0.0980694	0.0766306	0	0.343092	0	0	0	0.0689112	0.00538338	0.0221699	0.318	0.0398919	1.07667
TCGA.32.2634.01A.01R.1850.01	GBM	0	0.000207781	0.00229225	0.0238837	0	0.0254384	0	0.0566799	0	0	0.010077	0.028975	0	0.0184006	0.00267127	0.725205	0	0	0	0.0947608	0	0.0114079	0.058	0.147402	1.07283
TCGA.06.5415.01A.01R.1849.01	GBM	0.00435906	0.0264015	0	0.17287	0	0.108866	0	0.0432298	0.0193823	0	0.0141672	0.00698029	0.031534	0	0.0194584	0.516671	0	0	0.0360802	0	0	0	0.084	0.117895	1.04927
TCGA.26.5134.01A.01R.1850.01	GBM	0.00267366	0.0148762	0	0.125686	0	0.0726278	0	0.00746284	0.00965466	0	0.0723734	0	0.0179068	0.252907	0	0.345075	0	0.00555278	0.0732039	0	0	0	0.086	0.115487	1.05662
TCGA.32.1982.01A.01R.1850.01	GBM	0.0036254	0.00682826	0	0.0539598	0	0.068483	0	0.0547693	0	0	0	0.0599251	0.0293909	0	0.0123634	0.56002	0	0	0	0.0999212	0.0133008	0.0374127	0.18	0.0672492	1.08238
TCGA.19.2620.01A.01R.1850.01	GBM	0.0144493	0	0	0.0468494	0	0.0646755	0	0.0128573	0	0	0.00158592	0.101434	0.096817	0	0	0.481642	0	0.00485394	0	0.134612	0.00624206	0.0339806	0.394	0.0283367	1.10135
TCGA.32.2638.01A.01R.1850.01	GBM	0.00819953	0	0	0	0	0.10508	0	0.0102084	0.00732758	0	0.00847334	0.0228664	0.00749907	0	0.0776991	0.676428	0.00547232	0	0.042349	0	0	0.0283967	0.172	0.0728706	1.09609
TCGA.06.5416.01A.01R.1849.01	GBM	0	0.00456437	0.0487213	0.0783256	0	0	0	0.0862257	0	0.00744661	0	0.0295918	0	0.288256	0.0165877	0.359028	0	0	0	0.0812535	0	0	0.056	0.148706	1.05261
TCGA.26.5135.01A.01R.1850.01	GBM	0.00377338	0.00434976	0	0.0277684	0	0.106748	0	0.0205135	0.038203	0	0.0856722	0.019875	0.0424916	0.142385	0	0.414698	0	0.00211839	0	0.0684804	0	0.0229237	0.072	0.131844	1.04743
TCGA.12.1597.01B.01R.1849.01	GBM	0	0.0437058	0	0	0	0.0517756	0	0.0503062	0	0	0	0.0437723	0.116345	0	0.00722708	0.659067	0	0	0	0.021522	0	0.00627943	0.022	0.215562	1.02525
TCGA.19.2624.01A.01R.1850.01	GBM	0.0167115	0	0	0.0682063	0	0.0881294	0	0.130717	0	0	0.175441	0.0133635	0.0937209	0.0172016	0.00175636	0.30551	0	0.00181392	0	0.0796655	0.00251068	0.00525168	0.762	-0.0143238	1.10123
TCGA.41.2571.01A.01R.1850.01	GBM	0.0301648	0	0.00038649	0.0609394	0	0	0	0.0642835	0	0	0	0.0332721	0.0658416	0	0.00235013	0.525576	0	0	0	0.210007	0	0.00717887	0.096	0.105093	1.07446
TCGA.06.5417.01A.01R.1849.01	GBM	0	0.00178202	0	0.0446031	0	0.0913133	0	0.0645606	0	0	0.0144224	0.0269932	0.0490541	0	0	0.559951	0	0.00259725	0.117697	0	0	0.0270261	0.074	0.129975	1.04653
TCGA.26.5136.01B.01R.1850.01	GBM	0.0324801	0	0.00653969	0.0337819	0	0.1102	0	0.0355389	0	0	0.0348161	0.00490844	0.184502	0	0.0173135	0.523521	0	0	0.00319654	0	0	0.0132014	0.174	0.0718183	1.07616
TCGA.28.5216.01A.01R.1850.01	GBM	0	0.00789536	0	0.0918262	0	0.121142	0	0.00619494	0.0123796	0	0.10158	0.00835559	0.164542	0	0	0.360079	0	0	0	0.0792891	0.0157966	0.0309188	0.256	0.052041	1.07092
TCGA.76.4929.01A.01R.1850.01	GBM	0	0.00292607	0	0.041724	0	0.0911823	0	0.0046772	0.000230869	0	0.0548423	0.0294359	0.0353553	0.0433306	0.00118569	0.592578	0	0	0.0846486	0	0	0.0178834	0.162	0.0751327	1.08094
TCGA.06.5413.01A.01R.1849.01	GBM	0.00246749	0.0340023	0	0.0683636	0	0.0601941	0	0.0247867	0	0	0.0628971	0	0.033456	0	0.00459461	0.636381	0	0	0.0303422	0	0	0.0425148	0.008	0.277686	0.985517
TCGA.28.2510.01A.01R.1850.01	GBM	0.0563548	0	0	0.117908	0	0.103102	0	0.0544313	0.014117	0	0.0810905	0.00256033	0.121455	0	0	0.385292	0	0.00525406	0.00558154	0	0	0.0528532	0.194	0.0632137	1.06458
TCGA.26.5139.01A.01R.1850.01	GBM	0.00517741	0	0	0.0540763	0	0.156534	0	0.0221981	0.0397135	0	0.110761	0	0.0296857	0.043696	0.00726388	0.428096	0	0.000355447	0	0.0728123	0	0.0296313	0.2	0.0611447	1.07073
TCGA.06.5418.01A.01R.1849.01	GBM	0	0.0310896	0.000376465	0	0	0.0866308	0	0.0116274	0	0	0.0602893	0.0218647	0.178482	0	0	0.539587	0	0.00111749	0	0.0205828	0.0014111	0.0469416	0.274	0.0463159	1.09557
TCGA.12.5299.01A.02R.1849.01	GBM	0.00117764	0.00132073	0.000368976	0.00986439	0	0.142012	0	0.00617448	0.0158314	0	0.0803658	0.0121075	0.0983722	0	0.0315607	0.441941	0	0.0144284	0.0799061	0	0.011473	0.0530955	0.214	0.0576495	1.06613
TCGA.32.4213.01A.01R.1850.01	GBM	0	0.0226914	0	0.0658388	0	0.116041	0	0.0255849	0.0115669	0	0.00663057	0.0354022	0.0617629	0.000665359	0.0557373	0.568652	0	0	0.0194573	0	0	0.0099693	0.274	0.0463209	1.08735
TCGA.28.2499.01A.01R.1850.01	GBM	0.00446057	0	0	0.0564795	0	0.122427	0	0.018354	0.0065147	0	0.0476858	0.0184644	0.0304163	0	0.0100004	0.557207	0	0.00182218	0.109421	0	0	0.0167473	0.228	0.0561588	1.07707
TCGA.12.3652.01A.01R.1849.01	GBM	0.00761495	0	0	0.0670045	0	0.025918	0	0.0184483	0.00476953	0.0534841	0	0.0150896	0	0.0798983	0.0176236	0.553464	0	0	0.141025	0	0	0.0156597	0.184	0.0653229	1.08255
TCGA.19.2629.01A.01R.1850.01	GBM	0	0.00362451	0	0.0175136	0	0.109495	0	0.00584051	0	0	0.0144124	0.00579237	0.129216	0	0.0210887	0.678474	0	0.000769148	0	0.0118862	0	0.00188705	0.008	0.271436	0.999703
TCGA.41.2572.01A.01R.1850.01	GBM	0	0.00780515	0.00322241	0.0551227	0	0.0477575	0	0.0390472	0	0	0.0536175	0.00191557	0.0482033	0	0.0789252	0.620042	0	0	0.0291984	0	0	0.015143	0.23	0.0558549	1.09299
TCGA.12.5295.01A.01R.1849.01	GBM	0.00232279	0.00150709	0	0.0810178	0	0.0831309	0.00141029	0.0143117	0	0.00738034	0	0	0.039094	0	0.0212837	0.65303	0	0	0.0868925	0	0.00111613	0.00750291	0.098	0.102513	1.07291
TCGA.28.2509.01A.01R.1850.01	GBM	0	0.0178847	0	0.062044	0	0.108647	0.00464216	0.0204367	0	0	0.0489719	0	0.255832	0	0	0.386315	0	0.0026344	0.0925515	0	0	4.01597e-05	0.466	0.0177556	1.08431
TCGA.12.3653.01A.01R.1849.01	GBM	0.00235983	0	0	0.0417001	0	0.153408	0	0.0261902	0.00271196	0	0	0.0218363	0.0571368	0	0.0418503	0.474901	0	0.00032644	0.152412	0	0	0.025167	0.062	0.141793	1.03261
TCGA.32.2615.01A.01R.1850.01	GBM	0	0.0141828	0	0	0	0.207743	0	0.0122698	0.00616201	0	0.1071	0	0.113709	0	0.00639607	0.400407	0	0.00674422	0	0.0589201	0	0.066366	0.364	0.0323564	1.07867
TCGA.41.3915.01A.01R.1850.01	GBM	0.00184131	0.00910897	0.00223693	0.111509	0	0.0504856	0	0.0118532	0.00108776	0	0.0813491	0	0.175372	0	0.000990362	0.484589	0	0	0.0147512	0	0	0.0548265	0.088	0.112103	1.05749
TCGA.26.5133.01A.01R.1850.01	GBM	0	0.0584179	0.0158488	0.0811642	0.0106352	0.0386443	0	0	0.0302708	0	0.024776	0.0245942	0.0719771	0	0	0.501975	0	0	0.141697	0	0	0	0.094	0.107309	1.04733
TCGA.28.2513.01A.01R.1850.01	GBM	0	0.0209676	0	0	0	0.137294	0	0.0299246	0.0165075	0.0172348	0	0.0248728	0.128916	0	0.0640097	0.503996	0	0.00452726	0.039933	0	0	0.0118168	0.294	0.0437806	1.08185
TCGA.19.1390.01A.01R.1850.01	GBM	0.0080424	0	0	0.0397967	0	0.137778	0.00458113	0	0	0	0.16371	0.0230372	0.0883122	0	0	0.393104	0	0.00659411	0.0814419	0	0	0.0536017	0.668	-0.00709136	1.09595
TCGA.32.2616.01A.01R.1850.01	GBM	0	0.0411373	0.00149958	0.0679184	0	0.0973272	0	0.038882	0.0179692	0	0.0291264	0.0179744	0.0249702	0.105952	0.00331656	0.515183	0	0	0.0123005	0	0	0.0264427	0.046	0.161688	1.0368
TCGA.41.4097.01A.01R.1850.01	GBM	0	0.0212067	0.00293073	0.078055	0	0.095647	0	0.0212196	0.0117826	0	0.0776564	0	0.0509919	0	0.00475037	0.55877	0	0	0.0335206	0	0	0.0434689	0.234	0.0552942	1.08061
TCGA.26.5132.01A.01R.1850.01	GBM	0.0021984	0.0148588	0	0.0699772	0	0.0566059	0	0.0732734	0.0378104	0	0.112855	0	0.0305636	0	0	0.533957	0	0	0.0489842	0	0	0.0189156	0.122	0.0858711	1.06381
TCGA.28.2514.01A.02R.1850.01	GBM	0.0092543	0.00353696	0	0.116305	0	0.0901425	0	0.0260733	0.0419272	0	0.131744	0	0.0982221	0.061074	0.020997	0.265457	0	0	0.104141	0	0	0.0311266	0.328	0.0380735	1.06667
TCGA.19.1787.01B.01R.1850.01	GBM	0	0.0546809	0	0.0662437	0	0.0249603	0	0.017781	0.0109106	0	0	0	0	0.0406297	0.0138725	0.659314	0	0.00632808	0.0939631	0	0	0.011316	0.066	0.140221	1.05893
TCGA.32.2632.01A.01R.1850.01	GBM	0.00340335	0.0178569	0	0.0727645	0	0.0876135	0	0.0154737	0.0316527	0	0	0.0207739	0.0609886	0	0.0170129	0.62861	0	0	0.0286861	0	0	0.015164	0.128	0.0828306	1.07942
TCGA.06.5414.01A.01R.1849.01	GBM	0.00571282	0	0	0	0	0.198294	0	0.0155068	0.0138689	0	0.0973697	0	0.0418542	0.0207196	0.0133818	0.517771	0	0	0	0.0298205	0	0.0457007	0.198	0.0620963	1.07666
TCGA.06.0190.02A.01R.2005.01	GBM	0	0.00402018	0	0.033862	0	0.119521	0	0	0	0	0.0398622	0	0.00543634	0	0.00588319	0.709768	0	0.0031325	0.045016	0	0	0.0334984	0.178	0.0692639	1.09973
TCGA.76.4927.01A.01R.1850.01	GBM	0.00339223	0.0017154	0	0.0331025	0	0.162618	0	0.0184514	0.0274503	0	0.0986727	0	0.0662242	0	0.00833158	0.544579	0	0	0.00943257	0	0	0.0260302	0.182	0.0655776	1.07722
TCGA.06.5411.01A.01R.1849.01	GBM	0	0.0206183	0.00664172	0.0717968	0	0.0432656	0	0.0020942	0	0	0.0392608	0.000506228	0.246437	0	0.00955712	0.529414	0	0	0	0.00991536	0.00367401	0.0168189	0.02	0.221728	1.01491
TCGA.19.5960.01A.11R.1850.01	GBM	0	0	0	0.0704353	0	0.212609	0	0.103289	0	0	0	0.0835937	0.032024	0	0.00952788	0.480117	0	0.00161547	0.00445864	0	0.00232991	0	0.224	0.056682	1.0819
TCGA.28.5215.01A.01R.1850.01	GBM	0.0346482	0	0.0231505	0.0308858	0	0.0350578	0	0.0346414	0	0	0	0.0282023	0.156879	0	0.0193934	0.429039	0	0	0	0.179181	0.0254167	0.00350518	0.048	0.16035	1.03546
TCGA.76.4928.01B.01R.1850.01	GBM	0.0104531	0	0.000847793	0.0353498	0	0.0797513	0.0694373	0.00276386	0	0	0.0594213	0	0.134047	0	0	0.444599	0.0241158	0.000298065	0.0944139	0	0	0.0445016	0.374	0.0306892	1.07698
TCGA.06.5412.01A.01R.1849.01	GBM	0	0.00748607	0	0.0250731	0	0.0300389	0	0.0151395	0.0193941	0	0.0185822	0.0164904	0.155577	0	0.000951329	0.533977	0	0.00303216	0	0.128684	0	0.0455735	0.174	0.0712539	1.08959
TCGA.26.1442.01A.01R.1850.01	GBM	0.00520877	0	0	0.0377271	0	0.0904539	0	0.00347776	0.0115827	0	0.0951238	0	0.0374701	0	0.00608168	0.582275	0	0	0.121118	0	0	0.00948153	0.088	0.112084	1.05707
TCGA.06.0211.02A.02R.2005.01	GBM	0.00533822	0.0115895	0	0.033671	0	0.0770411	0	0.0143237	0.0352458	0	0.0742402	0	0.11872	0.0643341	0.0107943	0.425657	0	0	0	0.0974077	0	0.0316375	0.124	0.0840332	1.06395
TCGA.06.0125.02A.11R.2005.01	GBM	0	0.00893636	0.00171079	0.0736841	0	0.197907	0	0.0115531	0	0	0.0959783	0.00708214	0.122666	0	0	0.405446	0	0	0	0.0359562	0	0.0390797	0.356	0.0339449	1.08026
TCGA.06.0221.02A.11R.2005.01	GBM	0.00694366	0.0362231	0	0.0805248	0	0.155647	0	0	0.00476962	0	0.0555123	0	0.0732167	0	0.0205876	0.385993	0	0	0.152178	0	0	0.0284037	0.408	0.0254261	1.0694
TCGA.28.5213.01A.01R.1850.01	GBM	0	0.0326425	0	0.0406349	0	0.0748816	0.016073	0	0.0405728	0	0.0753059	0	0.167602	0	0.00278412	0.428872	0	0.00389741	0	0.0615503	0	0.0551837	0.144	0.0798756	1.06284
TCGA.06.0152.02A.01R.2005.01	GBM	0.0106325	0	0	0.00770224	0	0.203539	0	0.0388634	0.0422115	0	0	0.0403388	0.0224893	0.226077	0.109268	0.269446	0	0	0.0207151	0	0	0.00871621	0.07	0.134747	1.04513
TCGA.06.0171.02A.11R.2005.01	GBM	0.00242434	0	0.000270374	0.0240588	0	0.0465977	0	0.0053287	0.00303518	0	0	0.017593	0.147235	0	0.00415629	0.595018	0	0.000167488	0	0.0654094	0	0.0887062	0.022	0.214476	1.02903
TCGA.06.0210.02A.01R.2005.01	GBM	0.000824944	0.0120712	0.000284251	0.079608	0	0.081449	0.0043477	0.00794928	0.00180342	0	0.0483181	0	0.102318	0	0.00489675	0.613713	0	0.00144592	0	0.0239704	0	0.0169999	0.082	0.119471	1.06388
TCGA.14.0736.02A.01R.2005.01	GBM	0.0403497	0	0.166836	0.0518333	0	0.0819199	0	0.0382574	0	0.0113531	0.00833149	0	0.102917	0	0.0544383	0.426932	0	0	0.0047782	0	0	0.0120528	0.006	0.297693	0.967904
TCGA.19.0957.02A.11R.2005.01	GBM	0.00258967	0.00887963	0	0.0804102	0	0.252977	0	0.00664236	0	0	0.0729781	0.0490578	0.0476146	0	0	0.445823	0	0	0	0.00656779	0	0.0264606	0.282	0.0450859	1.08356
TCGA.19.1389.02A.21R.2005.01	GBM	0.00911995	0	0	0.0175747	0	0.0726495	0	0.0175344	0	0	0	0	0.112956	0.0396165	0	0.684005	0	0	0.0125846	0	0	0.0339597	0.244	0.0535557	1.12094
TCGA.14.1034.02B.01R.2005.01	GBM	0	0.0127621	0	0.0188668	0	0.21554	0	0.00180767	0.0104549	0	0	0.0522701	0.107739	0.0238957	0.00701743	0.312736	0	0	0.20436	0	0	0.0325505	0.428	0.0233048	1.07227
TCGA.14.1402.02A.01R.2005.01	GBM	0.00790048	0.00204746	0.0253711	0.100186	0	0.0818818	0	0.0408773	0	0	0	0.0223999	0.154295	0	0.0234432	0.425777	0	0	0	0.0718842	0	0.0439359	0.086	0.116967	1.04495
TCGA.19.4065.02A.11R.2005.01	GBM	0	0.0175269	0	0.0414778	0.00299172	0	0	0.0869763	0	0	0.00807582	0.035077	0.0268731	0.102164	0.0091917	0.625345	0	0	0	0.0320909	0	0.0122104	0.098	0.102495	1.08484
TCGA.06.5859.01A.01R.1849.01	GBM	0.0013728	0.00670297	0	0.0630235	0	0.142617	0	0.008357	0	0	0	0.0587399	0.0639772	0	0.014809	0.602077	0	0	0	0.0252971	0	0.0130261	0.014	0.231443	1.008
TCGA.06.5856.01A.01R.1849.01	GBM	0	0.00707048	0.00335951	0.015127	0	0.0329064	0	0	0	0	0.0218218	0	0.116542	0	0.00632727	0.756201	0	0	0.012214	0	0	0.0284313	0.126	0.0833602	1.1176
TCGA.32.1980.01A.01R.1850.01	GBM	0.00512199	0.0103632	0	0.0412681	0	0.0939374	0	0.00937011	0.0107168	0	0.0021797	0.0630118	0.0300644	0.0154405	0.0159308	0.560743	0	0	0	0.125614	0	0.0162376	0.116	0.0924348	1.07531
TCGA.28.5204.01A.01R.1850.01	GBM	0.0103824	0.0389965	0	0.0556567	0	0.138927	0	0.00989249	0.00819866	0	0.0297807	0	0.0494987	0	0.0287067	0.525596	0	0.00183282	0.0819489	0	0	0.0205825	0.262	0.0509751	1.07328
TCGA.28.5220.01A.01R.1850.01	GBM	0.00742646	0.0107287	0	0.0320214	0	0.0773066	0	0.0089062	0	0	0.000329505	0.0432739	0.160036	0	0.0281307	0.427727	0	0	0.188244	0	0	0.0158696	0.012	0.253811	0.985122
TCGA.76.4932.01A.01R.1850.01	GBM	0.011971	0	0	0.0352951	0	0.00286601	0	0.0119104	0.00754982	0	0	0.0221361	0.056011	0	0	0.723218	0	0	0.1053	0	0	0.023743	0.236	0.0544122	1.11619
TCGA.06.5858.01A.01R.1849.01	GBM	0	0.00516203	0	0	0	0.0245745	0	0.0235423	0	0.0029371	0	0.0253069	0.106033	0	0.0109748	0.737758	0	0	0	0.036824	0	0.0268881	0.012	0.249102	1.02383
TCGA.41.5651.01A.01R.1850.01	GBM	0	0.0658467	0.0122066	0.0881065	0	0.23361	0	0.0391611	0	0	0.0223369	0	0.0491121	0.162231	0	0.274938	0	0.00292547	0.0495253	0	0	0	0.236	0.0545402	1.0661
TCGA.28.5207.01A.01R.1850.01	GBM	0	0.0157306	0	0.0479086	0	0.0845784	0	0.0118676	0	0	0	0.0718911	0.0828412	0	0.0188018	0.592766	0	0	0	0.0354026	0.0255	0.0127121	0.014	0.234955	1.00644
TCGA.32.5222.01A.01R.1850.01	GBM	0	0.0025774	0.00123838	0	0	0.0731557	0	0.00531699	0	0.0176772	0	0.0502832	0.17237	0	0.0317402	0.509793	0	0	0	0.00104719	0.0676303	0.0671708	0.014	0.235662	1.0071
TCGA.06.1804.01A.01R.1849.01	GBM	0	0.0648557	0	0.0266162	0	0.0894313	0	0.0275061	0.00445222	0	0.054832	0.00142296	0.0972648	0	0.0381409	0.410832	0	0	0.110316	0	0	0.0743297	0.1	0.100816	1.04419
TCGA.76.4931.01A.01R.1850.01	GBM	0.00527049	0.00259715	0	0.0515346	0	0.125519	0	0.0132357	0.0155742	0	0.111708	0	0.0309107	0.178501	0.00400676	0.37738	0	0	0.0464118	0	0	0.0373512	0.124	0.0841744	1.06565
TCGA.28.5208.01A.01R.1850.01	GBM	0	0.0385236	0.00264833	0	0	0.0453293	0	0.124669	0	0.017665	0	0.0458271	0.00485053	0	0.00732164	0.613308	0	0	0.088986	0	0	0.0108714	0.03	0.19436	1.02148
TCGA.76.4925.01A.01R.1850.01	GBM	0.0149289	0	0	0.0818464	0	0.0660943	0	0.009727	0.0399084	0	0.0629442	0	0.0704178	0.261107	0.00428413	0.364865	0	0	0.00850544	0	0	0.0153712	0.094	0.107485	1.06764
TCGA.06.5408.01A.01R.1849.01	GBM	0.00544949	0.00268846	0.000685752	0.00334779	0	0.00320201	0	0.0312301	0.0148971	0.011756	0	0.0246685	0.0789419	0	0.0144227	0.655196	0	0.000614672	0.112072	0	0.00128209	0.0395448	0.32	0.0394869	1.11139
TCGA.14.0781.01B.01R.1849.01	GBM	0.0481952	0	0	0.0253121	0	0.0771858	0	0.00389934	0.0212101	0	0.0659427	0	0.152374	0	0	0.541596	0	0.00693371	0	0.0251703	0	0.0321807	0.346	0.0346483	1.09469
TCGA.19.4065.01A.01R.2005.01	GBM	0	0.0948998	0	0	0	0.0569216	0	0.0178879	0	0	0	0.0134544	0.139168	0	0.0129716	0.608546	0.0031196	0	0.0409563	0	0.00336041	0.00871444	0.116	0.092584	1.07839
TCGA.28.5209.01A.01R.1850.01	GBM	0.00436308	0.0095844	0	0	0	0.0378387	0	0.0242291	0.0220274	0.0581057	0	0.00533818	0	0.437481	0.0196067	0.33952	0	0	0	0.0242965	0	0.0176096	0.048	0.159347	1.07905
TCGA.76.4926.01B.01R.1850.01	GBM	0	0.0618612	0	0.0386257	0	0.129796	0	0.0191418	0.0113134	0	0.0722039	0	0.0730876	0	0.0154457	0.478028	0	0.00398369	0.0669296	0	0	0.0295829	0.07	0.13326	1.03422
TCGA.06.5410.01A.01R.1849.01	GBM	0.00601351	0.0102007	0	0.0193674	0	0.0482444	0.0116041	0	0.00891429	0	0.0597282	0	0.0961853	0	0.00236087	0.674914	0.00373602	0	0	0.00324652	0	0.055485	0.028	0.198195	1.03867
TCGA.15.1444.01A.02R.1850.01	GBM	0	0.00733447	0	0.00300922	0	0.0370954	0	0.0276026	0	0	0	0.0355168	0.187916	0	0.0108574	0.589307	0	0	0	0.063214	0.0248742	0.0132732	0.01	0.254428	1.00452
TCGA.06.0139.01A.01R.1849.01	GBM	0.00867743	0	0.00601259	0.0179272	0	0.00965089	0	0.0426456	0	0	0.000228682	0.0145353	0.0777838	0.154817	0.0383866	0.561649	0	0	0	0.00192888	0	0.0657567	0.01	0.256954	1.01119
TCGA.06.0747.01A.01R.1849.01	GBM	0	0.0145323	0.00631191	0.0574519	0	0.125345	0	0.0744249	0.00291747	0	0.105015	0.0164704	0.168105	0	0.00144334	0.283085	0	0.00818596	0	0.0971561	0.00238974	0.0371655	0.504	0.0111688	1.08236
TCGA.06.0129.01A.01R.1849.01	GBM	0.0472845	0	0.0111309	0.00975959	0	0.0243334	0	0.0293192	0	0	0	0.02236	0.0479209	0	0.0083927	0.773306	0	0	0	0.023254	0	0.00293914	0.006	0.303272	0.991288
TCGA.06.0157.01A.01R.1849.01	GBM	0	0.01869	0	0.0332208	0	0.0712477	0	0.0165346	0	0	0.0321472	0	0.111071	0	0.0342307	0.641571	0	0	0.0157341	0	0	0.0255528	0.114	0.094132	1.08242
TCGA.06.0190.01A.01R.1849.01	GBM	0	0.00160783	0.000392855	0.014284	0	0.034202	0	0.0477314	0	0.0223769	0	0.0277757	0.0770396	0.0622159	0.00655819	0.411502	0	0	0	0.263165	0.000698081	0.030451	0.2	0.0617257	1.10219
TCGA.12.0618.01A.01R.1849.01	GBM	0.0140361	0	0	0.0442422	0	0.138554	0	0.0540828	0	0	0.103295	0	0.0977185	0	0	0.373259	0.00208329	0	0.122541	0	0	0.0501876	0.33	0.0366187	1.0682
TCGA.06.0749.01A.01R.1849.01	GBM	0	0.0430568	0	0.0528307	0	0.108483	0	0.0364663	0	0	0.00421114	0.0685048	0.072586	0.0113553	0.000339967	0.540659	0	0	0	0.0462381	0.000133355	0.0151357	0.022	0.216285	1.00952
TCGA.06.0130.01A.01R.1849.01	GBM	0.00484127	0	0	0.0978036	0	0	0	0.036329	0.0103974	0.0286846	0	0.0580406	0.0852142	0	0.104505	0.529451	0.0093101	0	0	0.0270892	0	0.00833371	0.002	0.433712	0.902225
TCGA.06.0158.01A.01R.1849.01	GBM	0	0.0132132	0	0.0387518	0	0.0454809	0	0.0477496	0.0185107	0	0.0450438	0	0.0215657	0.109617	0.00445511	0.595773	0	0	0	0.035583	0	0.0242567	0.098	0.10434	1.07891
TCGA.12.0619.01A.01R.1849.01	GBM	0.00850504	0.0166981	0	0.0420958	0	0.0309748	0.00776873	0.0219099	0.0110091	0	0.0447811	0	0.074574	0	0.00426333	0.62451	0	0.00548397	0.018296	0	0	0.0891299	0.098	0.10287	1.07704
TCGA.06.0750.01A.01R.1849.01	GBM	0	0.0416424	0.000784773	0.0444577	0	0.152616	0	0.0258616	0	0	0.086586	0.0428547	0.114371	0	0.0136521	0.3763	0.0149042	0	0	0.0324879	0.00374696	0.0497338	0.444	0.0205108	1.08138
TCGA.12.0616.01A.01R.1849.01	GBM	0.00611716	0	0.0301433	0.14978	0	0.0664717	0	0.0493047	0	0	0.018145	0	0.0427445	0	0.0278983	0.584173	0	0	0.00875745	0	0	0.0164652	0.014	0.227151	1.00513
TCGA.06.0168.01A.01R.1849.01	GBM	0.00143451	0.0403809	0	0.0411764	0	0.0796554	0	0.0217774	0.025699	0	0.0425049	0	0.0890332	0	0.00755988	0.544086	0	0	0	0.0911598	0.00247474	0.0130574	0.314	0.040264	1.08835
TCGA.06.0210.01A.01R.1849.01	GBM	0.00286238	0.00711238	0	0.0338381	0	0.150109	0	0.0124107	0	0	0.0648016	0	0.124901	0	0	0.489648	0	0.00163364	0.0220329	0	0	0.0906503	0.242	0.053701	1.08217
TCGA.06.0238.01A.02R.1849.01	GBM	0	0.0413439	0	0.0313049	0	0.0980942	0	0.0447187	0	0	0	0.0745452	0.0256429	0	0.00581865	0.506294	0.00209026	0	0	0.0776449	0.0722547	0.0202476	0.004	0.307214	0.963516
TCGA.06.0649.01B.01R.1849.01	GBM	0.046124	0	0.0170583	0.0660758	0	0.0474501	0	0.0172308	0.00203391	0	0	0.0197864	0.179026	0	0.000726691	0.55974	0	0	0	0.0308826	0	0.0138657	0.042	0.170848	1.03673
TCGA.15.0742.01A.01R.1850.01	GBM	0.00933296	0.00415238	0	0.0613851	0	0.0712775	0	0.0113339	0.0415902	0	0.139021	0	0.134847	0	0	0.370449	0	0	0.123095	0	0	0.0335156	0.46	0.0183169	1.07839
TCGA.06.0141.01A.01R.1849.01	GBM	0.00543272	0.0155692	0	0.0407249	0	0.0419953	0	0.00452277	0	0	0.063074	0	0.0818894	0.0729789	0.00381921	0.591522	0.00312892	0	0.0365622	0	0	0.0387805	0.086	0.116109	1.07054
TCGA.06.0644.01A.02R.1849.01	GBM	0	0.0208027	0	0.0570801	0	0.0982091	0.00674774	0.027796	0.0287875	0	0	0	0.031571	0.0852401	0.00907986	0.565924	0.0129474	0	0.0389842	0	0	0.0168299	0.056	0.148464	1.04776
TCGA.06.0686.01A.01R.1849.01	GBM	0	0.0101651	0.000403327	0.0249134	0	0.116958	0	0.0423095	0.0294788	0	0.0846368	0.0100699	0.0191263	0.199152	0.0036886	0.423071	0	0	0	0.0246106	0	0.0114175	0.014	0.226559	1.00824
TCGA.06.0878.01A.01R.1849.01	GBM	0	0.00720066	0.0015141	0	0	0.0705808	0	0.0164971	0.0101506	0.0219134	0.0733795	0	0	0.289495	0.00387164	0.391885	0	0	0	0.0921926	0.00282744	0.0184925	0.088	0.112003	1.07975
TCGA.06.2557.01A.01R.1849.01	GBM	0.0273858	0	0.0141389	0.043066	0	0.0642976	0	0.0371707	0.00287111	0	0	0.0393158	0.07709	0	0.0341356	0.631766	0	0	0	0.0211453	0	0.00761718	0.076	0.126538	1.06133
TCGA.06.0646.01A.01R.1849.01	GBM	0	0.00301528	0	0.00263627	0.0016306	0.0171392	0	0.0336098	0	0	0	0.0411999	0.102455	0	0.01342	0.491456	0	0	0	0.199352	0.0808407	0.0132445	0.176	0.0697229	1.09365
TCGA.02.0047.01A.01R.1849.01	GBM	0	0.0143644	0	0.0210088	0	0.0903544	0	0.0284371	0.0191053	0	0.0515519	0.000868253	0.0035049	0.306603	0.00536126	0.425598	0	0	0.0139243	0	0	0.0193182	0.002	0.331654	0.966129
TCGA.06.0132.01A.02R.1849.01	GBM	0.0089187	0	0.000131118	0.0297272	0	0.0745155	0	0.00376979	0.00924219	0	0.0269208	0	0.157283	0	0.0198337	0.585458	0	0	0	0.0675335	0	0.0166662	0.028	0.200529	1.02706
TCGA.06.0174.01A.01R.1849.01	GBM	0.000334609	0.00176218	0	0.00422212	0	0	0	0.0200511	0.0260193	0.00492847	0	0.00653131	0	0.350369	0.000269572	0.53476	0	0.00439426	0.00991341	0	0	0.0364454	0.04	0.175608	1.08646
TCGA.06.0211.01A.01R.1849.01	GBM	0.00133734	0.00237794	0	0.0123331	0	0.0497229	0	0.0391899	0.0162136	0	0.0460381	0.0101657	0.0199743	0.311518	0.000853625	0.452721	0	0	0	0.0161043	0	0.0214498	0.048	0.158365	1.06694
TCGA.06.0645.01A.01R.1849.01	GBM	0.00463625	0.00514231	0.000402785	0.0242972	0	0.0874354	0	0.0137263	0.0118481	0	0.0710252	0.0146324	0.206556	0	0.00567349	0.309485	0	0.00228404	0	0.206807	0.00491546	0.0311335	0.294	0.0438904	1.08603
TCGA.06.0743.01A.01R.1849.01	GBM	0	0.0327604	0.00573012	0.0829979	0	0.00421342	0	0.0885712	0	0	0.00568318	0.0281276	0.103795	0.0583061	0.0250507	0.55936	0	0	0	0	0	0.00540464	0.062	0.141732	1.04999
TCGA.02.0055.01A.01R.1849.01	GBM	0	0.00595808	0.00619679	0.0204658	0	0.0335739	0	0.00874928	0	0	0	0.0330792	0.181828	0.0921238	0.000653278	0.461887	0	0.00379679	0	0.115412	0	0.0362749	0.066	0.140269	1.059
TCGA.06.0138.01A.02R.1849.01	GBM	0	0.00480125	0.000919007	0.0337286	0	0.0191708	0	0.0370326	0	0	0	0.0348749	0.118326	0.0153258	0.0242912	0.494269	0	0	0	0.198354	0.00958813	0.0093188	0.046	0.160981	1.04805
TCGA.06.0178.01A.01R.1849.01	GBM	0	0.0204498	0.0193637	0.0524583	0	0.00801628	0	0.0250352	0	0	0	0.035169	0.0576635	0	0.0185605	0.653729	0	0	0	0.081005	0.00604506	0.0225042	0.002	0.417907	0.914464
TCGA.06.0211.01B.01R.1849.01	GBM	0.0015977	0.00421165	0	0	0.0254643	0	0	0.0398414	0	0	0.0337474	0.00947599	0.00920762	0.0980888	0.0156398	0.719582	0	0	0.0290694	0	0	0.0140735	0.03	0.196793	1.05291
TCGA.19.2625.01A.01R.1850.01	GBM	0.02618	2.7333e-05	0.000619129	0.0392191	0	0.127071	0	0.00679964	0.00993324	0	0.209739	0.0440701	0.1164	0.00914577	0.0120836	0.240962	0	0	0.107618	0	0.0172155	0.0329164	0.524	0.00867458	1.09081
TCGA.06.0744.01A.01R.1849.01	GBM	0	0.0134645	0	0.0989627	0	0.0521179	0	0.121025	0	0	0.080912	0.00440837	0.0556051	0	0.0165154	0.507111	0.000463108	0	0.00893857	0	0	0.0404765	0.074	0.130059	1.04459
TCGA.06.0125.01A.01R.1849.01	GBM	0.012727	0	0	0	0.0882494	0	0	0.0265806	0	0.0238129	0.0137591	0.000290715	0	0.354498	0.00478924	0.313121	0	0	0.0854913	0	0	0.0766808	0.074	0.130434	1.07091
TCGA.06.0156.01A.02R.1849.01	GBM	0.000202984	0.0241984	0.0106826	0.0967198	0	0.101926	0	0.022861	0	0	0.066256	0	0.0381484	0	0.012357	0.465043	0	0.000141736	0	0.0822277	0	0.0792356	0.12	0.0895874	1.05815
TCGA.06.0184.01A.01R.1849.01	GBM	0.00701258	0	0	0	0	0.0904256	0	0.010195	0	0	0	0.0633629	0.146042	0	0.000803125	0.611145	0	0	0	0.0465934	0	0.0244202	0.232	0.0555293	1.10262
TCGA.08.0386.01A.01R.1849.01	GBM	0.00980833	0	0	0	0	0.0649061	0	0.0170437	0.00744331	0	0.111716	0	0.0206161	0.0802543	0.00289945	0.470601	0	0	0.139735	0	0	0.0749759	0.122	0.085276	1.06565
TCGA.06.0745.01A.01R.1849.01	GBM	0	0.00975314	0	0.0209613	0	0.00886572	0	0.0636467	0	0	0	0.0233199	0.0456321	0.0374216	0.00912742	0.62995	0	0	0	0.131292	0	0.0200301	0.002	0.358968	0.950667
TCGA.06.0156.01A.03R.1849.01	GBM	0	0.0207609	0.00879317	0.066242	0	0.0928702	0	0	0.00486032	0	0.0835066	0	0.0954806	0	0.0121128	0.514688	0	0	0	0.0379505	0	0.062735	0.112	0.095307	1.06252
TCGA.06.0187.01A.01R.1849.01	GBM	0	0.0059693	0	0.00417353	0	0.221712	0	0.00935179	0.0377603	0	0.0930346	0	0.104196	0	0.00503121	0.368164	0	0.00207285	0	0.104262	0	0.0442726	0.364	0.0324771	1.07663
TCGA.06.0219.01A.01R.1849.01	GBM	0.00444308	0.0125557	0	0.0556359	0	0.176708	0	0.0218319	0	0	0.0660743	0.0824627	0.102806	0	0.0102545	0.358055	0	0.00254538	0	0.0442694	0.0193073	0.0430512	0.19	0.0644328	1.06781
TCGA.06.2564.01A.01R.1849.01	GBM	0.00200956	0	0	0.0222862	0	0.118582	0	0.00793503	0.000198015	0	0.0842504	0.00267407	0.0334483	0	0	0.610371	0	0	0.0797479	0	0	0.0384983	0.126	0.0833806	1.07537
TCGA.27.2526.01A.01R.1850.01	GBM	0.00468599	0.0215629	0	0.214572	0	0.0497385	0	0.0512559	0.0106939	0	0.0163625	0.0459514	0.0532113	0	0.0234401	0.450619	0	0.0123408	0.0387066	0	0.00283031	0.00402821	0.182	0.0655607	1.06711
TCGA.14.0817.01A.01R.1849.01	GBM	0	0.00607966	0	0.0187591	0	0.0522629	0	0.0244721	0	0	0	0.0394463	0.160764	0	0.0240245	0.545604	0	0	0	0.112769	0.00509443	0.010724	0.068	0.136901	1.05716
TCGA.14.1823.01A.01R.1849.01	GBM	0	0.00598949	0	0.041591	0	0.183247	0	0.00511227	0.0167875	0	0.0802738	0.00302445	0.163936	0	0.00260008	0.426766	0	0.00296784	0	0.028725	0	0.0389795	0.38	0.0299003	1.08413
TCGA.02.2483.01A.01R.1849.01	GBM	0	0.00154913	0.00197291	0.0476311	0	0	0	0.0408204	0	0	0	0.0381568	0.129645	0	0.00607145	0.632608	0	0	0	0.0883068	0	0.0132383	0.002	0.390608	0.931396
TCGA.06.2563.01A.01R.1849.01	GBM	0.00910301	0	0	0	0	0.0978937	0	0.00336837	0	0.0175757	0	0.0170134	0.00834521	0.00617835	0.0125876	0.660746	0	0.0157112	0.12719	0	0	0.0242867	0.098	0.10351	1.07541
TCGA.27.1831.01A.01R.1850.01	GBM	0	0.000636326	0	0.0574251	0	0.0669193	0	0.014938	0	0.0390142	0	0.0692141	0.211286	0	0.0287706	0.467822	0	0.00222175	0	0.0189955	0.0177053	0.0050515	0.108	0.0988831	1.06444
TCGA.27.2528.01A.01R.1850.01	GBM	0.0119809	0	0	0	0	0.0348271	0	0.0467244	0	0	0.0482049	0.0210526	0.0241164	0.341305	0	0.43197	0	0	0	0.0398192	0	0	0.042	0.173184	1.06303
TCGA.14.0871.01A.01R.1849.01	GBM	0	0.00250611	0	0.107826	0	0.138102	0	0.0740436	0	0	0	0.0399026	0.0823434	0.117365	0	0.244703	0	0.00293268	0.180202	0	0	0.0100733	0.358	0.0330776	1.06944
TCGA.14.1825.01A.01R.1850.01	GBM	0	0.0352958	0	0.0324157	0	0.175679	0	0.0675743	0.0197859	0	0.0745018	0.0136482	0.0592126	0	0	0.43221	0	0	0.0591061	0	0	0.0305708	0.098	0.102787	1.0462
TCGA.02.2485.01A.01R.1849.01	GBM	0	0.0164857	0.00661954	0.0155228	0	0	0	0.198057	0	0.054341	0	0.105907	0.0734331	0.00617191	0.0745228	0.342673	0	0	0	0.0949941	0.0112715	0	0.078	0.124256	1.04494
TCGA.27.2519.01A.01R.1850.01	GBM	0	0.0653325	0	0.0544746	0	0.17962	0	0.0117656	0.0140359	0	0.00232866	0.0390264	0.0994813	0	0.0109745	0.483127	0	0	0	0.012286	0	0.027547	0.08	0.121508	1.04548
TCGA.27.1835.01A.01R.1850.01	GBM	0	0.00285819	0	0	0.0400665	0.0201523	0	0.036509	0	0.0871608	0	0.0618104	0	0.0577196	0.0160867	0.394221	0	0.00406343	0.26826	0	0	0.0110919	0.436	0.0218555	1.08832
TCGA.28.1747.01C.01R.1850.01	GBM	0.00461723	0	0	0.0463317	0	0.183281	0	0.00582202	0	0	0.0205006	0.0528092	0.0597264	0	0.0220032	0.558108	0	0.00821762	0.0216072	0	0	0.0169757	0.056	0.148096	1.04137
TCGA.16.0846.01A.01R.1850.01	GBM	0	0.0118464	0.00311542	0.0704097	0	0.0780879	0	0.0135627	0	0	0	0.0114997	0.136812	0	0.0826369	0.47803	0	0	0	0.108927	0.00296431	0.00210849	0.012	0.249407	0.993601
TCGA.14.1829.01A.01R.1850.01	GBM	0	0.0159571	0	0.0333106	0	0.094867	0.00509093	0	0	0	0.0491467	0	0.2764	0	0.00534119	0.489487	0	0.00904016	0.00786602	0	0	0.0134936	0.078	0.124261	1.05914
TCGA.02.2486.01A.01R.1849.01	GBM	0.00578969	0	0.000746418	0.0618834	0	0.0501634	0.0119944	0.0314649	0.0245109	0	0.0349744	0	0.132906	0	0.00713538	0.543046	0	0.00799978	0.0412829	0	0	0.0461026	0.25	0.0529249	1.08451
TCGA.06.2565.01A.01R.1849.01	GBM	0.00209557	0.0137217	0	0.0494964	0	0.13334	0	0.00481977	0.00210856	0	0	0.00957414	0.0365147	0	0.0164871	0.590947	0.00457185	0	0.136324	0	0	0	0.12	0.0891803	1.06841
TCGA.27.1837.01A.01R.1850.01	GBM	0.00280156	0	0.00301687	0.0207512	0	0.185935	0	0.0336259	0	0	0.146964	0.0538341	0.0493835	0.0300817	0.0513701	0.248931	0.00179828	0	0.160622	0	0	0.0108853	0.32	0.0395157	1.07148
TCGA.28.1753.01A.01R.1850.01	GBM	0	0.0240625	0	0.020036	0	0	0	0.0416602	0.0136973	0	0.00748029	0.0131695	0	0.317053	0.00725212	0.536709	0	0	0	0.0125229	0	0.00635723	0	0.498361	0.873744
TCGA.12.3650.01A.01R.1849.01	GBM	0	0.0128892	0	0.120699	0	0.0328736	0	0.024765	0.0129674	0	0.0457041	0	0.0107819	0.0287622	0.00202907	0.599541	0	0	0.0909544	0	0	0.0180333	0.03	0.194777	1.02242
TCGA.06.2562.01A.01R.1849.01	GBM	0.00530973	0.0042276	0	0.0328181	0	0.0941838	0	0.0096841	0.0180136	0	0.0884604	0	0.0311304	0.0790502	0	0.508972	0	0.005093	0	0.0801338	0	0.0429233	0.192	0.0637811	1.08255
TCGA.06.2567.01A.01R.1849.01	GBM	0	0.00976658	0.00195757	0.0023135	0	0.0305278	0	0.0622432	0	0	0	0.0596854	0.159178	0	0.0174834	0.559574	0	0	0	0.038772	0.00444626	0.0540529	0.02	0.221968	1.01599
TCGA.06.0882.01A.01R.1849.01	GBM	0.00132823	0.00174698	0	0.0380641	0	0.14088	0	0.00548146	0.000425975	0	0.0636325	0.0027287	0.142788	0	0.00252043	0.567616	0	0.00301396	0	0.00729247	0	0.0224803	0.104	0.0997898	1.06965
TCGA.14.1034.01A.01R.1849.01	GBM	0	0.0105436	0	0.0368729	0	0.0240482	0	0.0138679	0	0	0	0	0.248677	0	0	0.474043	0	0	0.131971	0	0	0.059975	0.194	0.0634222	1.08974
TCGA.06.2558.01A.01R.1849.01	GBM	0	0.0225941	0	0.0555263	0	0.104871	0	0.00667826	0.00228471	0	0.00922195	0	0.112786	0.0375143	0	0.59909	0	0	0	0.0212519	0	0.0281813	0.008	0.282068	0.986782
TCGA.06.2569.01A.01R.1849.01	GBM	0	0	0	0.0329169	0	0.204404	0	0.00574152	0.0123169	0	0.0627781	0.020599	0.0542322	0.137793	0	0.395208	0	0.0209546	0.0530559	0	0	0	0.108	0.0989718	1.05525
TCGA.27.2521.01A.01R.1850.01	GBM	0	0.0154503	0	0.0207718	0	0.0429024	0	0.0136943	0	0	0.00219088	0	0.0989635	0.0415967	0	0.489966	0	0	0.255538	0	0	0.0189261	0.086	0.11663	1.06056
TCGA.12.0821.01A.01R.1849.01	GBM	0.000337218	0	0.00101125	0.0413495	0	0.0159434	0	0.054115	0.0266589	0	0.082357	0	0.00311596	0.364469	0	0.394755	0	0	0.00448256	0	0	0.011405	0.022	0.214329	1.03747
TCGA.27.1830.01A.01R.1850.01	GBM	0	0.0163445	0.0139047	0.0378357	0	0	0	0.0405166	0	0	0	0.0473369	0.0584004	0	0.00185607	0.473668	0	0.000322082	0	0.280259	0	0.0295563	0.042	0.165928	1.05555
TCGA.06.2559.01A.01R.1849.01	GBM	0.00708255	0	0	0.081919	0	0.07736	0	0.0408859	0.0203593	0	0.068215	0.0198834	0.118385	0.0996929	0.00932805	0.388327	0	0	0.0290682	0	0	0.0394939	0.092	0.107996	1.05063
TCGA.06.2570.01A.01R.1849.01	GBM	0	0.0205087	0	0.028503	0	0.0081383	0	0.0243384	0	0	0.0310596	0.0104728	0.108323	0	0.0127474	0.707329	0	0	0.0121588	0	0	0.0364204	0.002	0.374747	0.945004
TCGA.14.0787.01A.01R.1849.01	GBM	0	0.078496	0	0.0418423	0	0.152425	0	0.0116741	0	0	0.00382105	0.00357588	0.037832	0	0.0305188	0.537619	0.000383322	0	0.0868135	0	0	0.0149993	0.182	0.0654618	1.06867
TCGA.27.1832.01A.01R.1850.01	GBM	0.00639479	0.0213974	0	0.0776505	0	0.0711956	0	0.0338488	0.0310879	0	0.0556356	0.0253057	0.175679	0	0.0184306	0.433583	0	0	0.0410423	0	0	0.00874887	0.376	0.0305437	1.0794
TCGA.06.2561.01A.02R.1849.01	GBM	0.000640988	0.00208392	0	0.105485	0	0.0778718	0	0.0140999	0	0	0.0352123	0	0.175803	0	0.000305025	0.51851	0	0	0.0330641	0	0	0.0369242	0.202	0.0607011	1.08233
TCGA.14.0790.01B.01R.1849.01	GBM	0.0153376	0	0	0.0291969	0.0192675	0.000682591	0	0.0844563	0	0	0	0.0494918	0.00831471	0	0.0664468	0.386536	0	0	0.32998	0	0	0.0102893	0.328	0.0385794	1.084
TCGA.27.2524.01A.01R.1850.01	GBM	0.00210493	0.00132891	0.00110614	0	0	0.029807	0	0.0482152	0.0120896	0.0547583	0.0426401	0	0	0.357312	0.00357795	0.304932	0	0	0	0.128121	0.00486986	0.00913674	0.032	0.191137	1.04547
TCGA.14.0789.01A.01R.1849.01	GBM	0.00797445	0.0064904	0	0	0	0.176265	0	0.0287046	0.0394716	0	0.140407	0	0.0355067	0.0848118	0.0034656	0.359403	0	0	0	0.0761029	0	0.0413974	0.26	0.051469	1.0723
TCGA.16.1045.01B.01R.1850.01	GBM	0.0143823	0	0	0.0205417	0	0.10086	0	0.0105151	0.000997474	0	0.0510391	0	0.0175451	0	0.00081509	0.725276	0	0	0.0374297	0	0	0.0205984	0.16	0.0765911	1.09927
TCGA.27.1834.01A.01R.1850.01	GBM	0	0.0380372	0	0.0299198	0	0.0551184	0	0.0170407	0	0	0	0.0211176	0.143856	0	0.0218934	0.630975	0	0	0.0297861	0	0	0.012256	0.008	0.282657	0.987697
TCGA.14.2554.01A.01R.1850.01	GBM	0.003409	0.0117868	0	0.05216	0	0.186636	0	0	0.00309246	0	0.106218	0.00958654	0.168383	0	0.000596307	0.339563	0	0.00745062	0	0.0866759	0.006002	0.0184408	0.376	0.0305459	1.07721
TCGA.27.2523.01A.01R.1850.01	GBM	0.00189339	0.0159499	0	0	0	0.017241	0	0.0157469	0.010695	0.0184249	0	0.0116857	0	0.296184	0	0.549322	0	0.0172586	0.0455988	0	0	0	0.04	0.184477	1.06588
TCGA.06.0681.11A.41R.A36H.07	GBM	0.0309749	0.0453709	0.0192277	0.0663546	0	0.0499341	0	0.060349	0	0	0	0.0962188	0.154445	0.0121252	0.00443856	0.139605	0	0	0	0.265067	0.0558882	0	0.262	0.0510767	1.08889
TCGA.06.0675.11A.32R.A36H.07	GBM	0	0.0187726	0.00262602	0.236147	0	0.0677571	0	0.0478693	0	0	0	0.0509136	0.0661265	0	0.00988638	0.343448	0	0	0	0.141967	0.0065657	0.00792165	0.786	-0.0158315	1.10371
TCGA.06.0680.11A.32R.A36H.07	GBM	0	0.0263405	0	0.0577928	0.00612934	0.0176065	0	0.0765008	0	0	0	0.064422	0.221358	0	0	0.318386	0	0	0	0.210936	0.000527745	0	0.924	-0.0274757	1.12002
TCGA.06.AABW.11A.31R.A36H.07	GBM	0	0.0502784	0	0	0.0936163	0	0	0.0558086	0	0	0.0152073	0.013368	0.279262	0	0	0.401705	0	0	0	0.0907545	0	0	0.776	-0.0150287	1.10912
TCGA.06.0678.11A.32R.A36H.07	GBM	0	0.00944778	0	0.0667315	0	0.00892309	0	0.100136	0	0	0	0.0582356	0.193785	0.0334575	0.00738081	0.122301	0	0.000189163	0	0.348951	0.050462	0	0.646	-0.00583513	1.14039
