# Supplementary material for: DNA5mC Regulator-Mediated Molecular Clusters and Tumor Microenvironment Signatures in Glioblastoma
Source: Front Cell Dev Biol. 2022 Nov 8;10:1055567. doi: 10.3389/fcell.2022.1055567 (PMC9679379; doi:10.3389/fcell.2022.1055567)
Supplement: Supplementary file 2 [file Table3.XLSX]

## Sheet: Sheet1
Gene	logFC	AveExpr	t	P.Value	adj.P.Val	B	change
ACOT11	-1.28588	2.47052	-6.32933	1.76153e-08	2.6261e-05	9.04154	DOWN
MAFK	-1.12853	4.18859	-6.2323	2.64196e-08	2.979e-05	8.83328	DOWN
MICALL2	-1.16198	5.73387	-6.1295	4.05188e-08	3.06306e-05	8.45685	DOWN
NME1	1.00001	6.36305	6.10858	4.41922e-08	3.06306e-05	8.37222	UP
PARPBP	1.00849	2.41148	5.94673	8.62396e-08	4.46133e-05	7.6794	UP
MAD2L1	1.14451	4.54222	5.86385	1.21197e-07	5.3935e-05	7.41623	UP
TRAF4	1.14844	6.33414	5.85982	1.23215e-07	5.3935e-05	7.39523	UP
MYH7B	-1.46646	0.630789	-5.73111	2.08369e-07	7.21849e-05	6.59618	DOWN
GSX1	2.75139	0.442301	5.57017	3.9974e-07	9.99876e-05	6.17856	UP
DEPDC1B	1.26612	2.43859	5.43183	6.96161e-07	0.00013713	5.75703	UP
MROH7	-1.94519	-0.844529	-5.40218	7.83547e-07	0.000145001	5.11882	DOWN
AP1G2	-1.01053	3.31027	-5.37047	8.88911e-07	0.000155641	5.52718	DOWN
CDC45	1.34122	3.00108	5.34199	9.95362e-07	0.000166477	5.43816	UP
GRIN3B	-2.02926	-1.47282	-5.30383	1.15778e-06	0.000177468	4.63362	DOWN
SIX1	1.58862	1.91915	5.29841	1.18289e-06	0.000177468	5.2538	UP
MUC6	-2.23852	-1.37563	-5.27443	1.30045e-06	0.00018021	4.5366	DOWN
BHLHE40	-1.11067	6.61722	-5.25279	1.41633e-06	0.000187459	5.07176	DOWN
UBE2T	1.11519	3.86971	5.25275	1.41653e-06	0.000187459	5.10032	UP
TRIM56	-1.19494	5.92827	-5.24219	1.47673e-06	0.000190529	5.03927	DOWN
ZNF726	1.09589	1.49086	5.23601	1.51313e-06	0.000191364	4.99922	UP
MUC1	-1.28992	3.75782	-5.22191	1.59939e-06	0.000197855	4.9927	DOWN
LTB4R	-1.19032	2.77316	-5.1723	1.9432e-06	0.000227996	4.78575	DOWN
RAD51	1.07507	2.41735	5.1588	2.04873e-06	0.000233433	4.75774	UP
PARP10	-1.00631	5.57166	-5.14714	2.14431e-06	0.000240438	4.69036	DOWN
SPC25	1.19417	2.78594	5.14519	2.16068e-06	0.000240862	4.71538	UP
MAP3K6	-1.12051	4.78291	-5.14418	2.16926e-06	0.000240862	4.70095	DOWN
ESCO2	1.30539	2.41333	5.13413	2.25617e-06	0.000245081	4.671	UP
CDK4	1.54375	6.9824	5.12648	2.32456e-06	0.0002495	4.61015	UP
PNPLA7	-1.15701	3.11858	-5.07797	2.80801e-06	0.000284071	4.46106	DOWN
BTBD19	-1.16483	2.72232	-5.06706	2.92963e-06	0.000285892	4.40991	DOWN
MYO15B	-1.29247	4.10245	-5.06024	3.0083e-06	0.000290148	4.40812	DOWN
KCNC3	-1.04976	3.29842	-5.04347	3.21059e-06	0.000297071	4.34317	DOWN
KIFC2	-1.08348	4.46332	-5.03274	3.34692e-06	0.000307188	4.30227	DOWN
ZNF649	1.10772	3.98365	4.99698	3.84322e-06	0.000330111	4.15864	UP
MND1	1.1193	1.42722	4.97229	4.2273e-06	0.000353757	4.065	UP
MC1R	-1.01584	2.05438	-4.95776	4.47068e-06	0.000368701	4.00333	DOWN
ISL2	1.40598	-0.273756	4.92312	5.10725e-06	0.000396044	3.81525	UP
MMP16	1.30134	4.99586	4.9227	5.11541e-06	0.000396044	3.86214	UP
NCALD	1.0552	5.79029	4.90539	5.46645e-06	0.000416145	3.79242	UP
VASH2	1.05892	1.45765	4.89876	5.60721e-06	0.00042107	3.80904	UP
PLEKHN1	-1.57582	-2.32316	-4.89604	5.66582e-06	0.00042107	3.20603	DOWN
MYBPC3	-1.39181	-2.22921	-4.86407	6.4023e-06	0.000448397	3.15162	DOWN
IGFALS	-1.46756	-1.65332	-4.78717	8.57751e-06	0.000531993	3.02355	DOWN
XKRX	-1.84325	-1.88707	-4.76977	9.16169e-06	0.000553152	2.8917	DOWN
STAG3L5P	-1.21886	2.29094	-4.76465	9.34087e-06	0.000560995	3.34379	DOWN
BIRC5	1.3627	5.34851	4.75447	9.70727e-06	0.000568012	3.25294	UP
PCSK4	-1.19613	2.01444	-4.72282	1.09384e-05	0.000607269	3.19369	DOWN
FAM151A	-1.33268	-1.4535	-4.67871	1.29105e-05	0.000675563	2.73252	DOWN
PKD1L2	-1.76425	0.000992188	-4.67049	1.33149e-05	0.000685688	2.87925	DOWN
LAMA3	-1.58973	1.16522	-4.66589	1.35462e-05	0.000695518	2.96398	DOWN
ABCA7	-1.20821	3.27407	-4.66437	1.36233e-05	0.000696838	3.01565	DOWN
FAM162B	1.18779	0.557365	4.65498	1.41111e-05	0.00071377	2.951	UP
GINS2	1.03488	3.84635	4.64319	1.47469e-05	0.000730816	2.90286	UP
CRACR2B	-1.24412	1.47193	-4.6411	1.48622e-05	0.000730816	2.90132	DOWN
MSANTD1	-1.04381	-0.591546	-4.63728	1.50758e-05	0.00073324	2.74671	DOWN
MAMDC4	-1.29524	2.90888	-4.63286	1.53269e-05	0.000740702	2.90596	DOWN
ANKRD24	-1.24172	2.2145	-4.62205	1.5958e-05	0.00075204	2.85822	DOWN
PTCH2	-1.08702	3.34427	-4.57428	1.9061e-05	0.000845341	2.7075	DOWN
KCNN4	-1.6339	1.88966	-4.55918	2.01582e-05	0.000867435	2.63651	DOWN
UPK3B	-1.43011	-2.31307	-4.55166	2.07272e-05	0.000881857	2.19334	DOWN
AP006621.6	-1.5759	-1.52344	-4.54755	2.10452e-05	0.000887095	2.30184	DOWN
CLCF1	-1.45854	3.10081	-4.54542	2.12118e-05	0.000887544	2.61089	DOWN
FER1L4	-1.86466	1.35427	-4.53533	2.20181e-05	0.000912889	2.53654	DOWN
NXPH1	1.85674	3.26983	4.53215	2.22781e-05	0.000921988	2.53361	UP
MALAT1	-1.13444	6.81765	-4.52875	2.25596e-05	0.000928575	2.45357	DOWN
NUF2	1.06298	3.3253	4.50919	2.42477e-05	0.000977064	2.46164	UP
RAET1G	-1.22404	-1.24691	-4.47427	2.75712e-05	0.00106513	2.14333	DOWN
HPGD	1.07528	-0.0046206	4.43732	3.15667e-05	0.00113917	2.21529	UP
EGF	-1.14285	1.97931	-4.40497	3.55232e-05	0.00122142	2.13588	DOWN
SYNE4	-1.16687	-0.855318	-4.39376	3.70026e-05	0.00125149	1.94892	DOWN
LMNTD2	-1.46714	-0.296994	-4.35256	4.29704e-05	0.00138266	1.8608	DOWN
DCC	1.38902	2.50062	4.34535	4.41067e-05	0.00140039	1.93503	UP
TSFM	1.14746	5.07554	4.33939	4.50681e-05	0.00142083	1.81134	UP
METTL1	1.16953	4.44474	4.33775	4.53353e-05	0.00142531	1.82461	UP
ASIC3	-1.13097	2.59373	-4.31161	4.98221e-05	0.00149177	1.83607	DOWN
MDFI	1.27856	4.84789	4.30023	5.19063e-05	0.0015344	1.68413	UP
CCDC154	-1.28715	0.138219	-4.28147	5.55267e-05	0.0016019	1.68079	DOWN
ITGB4	-1.35595	6.9359	-4.27241	5.73624e-05	0.00163663	1.57731	DOWN
PILRB	-1.48088	2.20814	-4.25817	6.03647e-05	0.00168799	1.66175	DOWN
CCNB2	1.05181	4.04118	4.25243	6.16189e-05	0.00171884	1.55825	UP
INHA	-1.11071	0.286767	-4.25128	6.18716e-05	0.00172166	1.6001	DOWN
MCM10	1.10936	2.23643	4.24681	6.28682e-05	0.00173245	1.61954	UP
MEX3A	1.16601	4.49333	4.2352	6.55326e-05	0.00178428	1.47823	UP
MYBPH	-2.2149	1.91752	-4.22623	6.76634e-05	0.00182313	1.55329	DOWN
PRSS53	-1.1498	0.735443	-4.21965	6.92687e-05	0.00183728	1.51714	DOWN
FEV	2.19193	-2.85211	4.20951	7.18173e-05	0.00187897	1.32756	UP
MEFV	-1.12182	-0.200707	-4.19983	7.43331e-05	0.00191616	1.4137	DOWN
AHRR	-1.00362	1.29221	-4.19548	7.54923e-05	0.00193727	1.45465	DOWN
TSPAN31	1.2814	6.3137	4.19431	7.58068e-05	0.00193878	1.31938	UP
NPIPB11	-1.00436	0.240898	-4.18506	7.83367e-05	0.00198122	1.39427	DOWN
SH3D21	-1.03845	2.60515	-4.15727	8.64407e-05	0.00212022	1.3386	DOWN
SLC9A3	-1.37192	-0.130661	-4.13634	9.30698e-05	0.00222527	1.21624	DOWN
AANAT	-1.07688	-0.352765	-4.12982	9.52362e-05	0.00225339	1.1936	DOWN
FLNA	-1.00545	9.5474	-4.12452	9.70306e-05	0.00226757	1.12306	DOWN
CPT1B	-1.1409	0.00476336	-4.09417	0.000107949	0.00242213	1.10407	DOWN
GPC3	1.55434	1.3479	4.08557	0.000111255	0.00247546	1.11259	UP
AURKB	1.09787	3.24783	4.08391	0.000111905	0.00248264	1.05055	UP
LTB4R2	-1.01265	0.0509245	-4.06969	0.000117613	0.00254964	1.03411	DOWN
RTKN2	1.07962	2.01814	4.06563	0.000119292	0.00256405	1.04304	UP
ZDHHC11	-1.18565	1.36364	-4.06157	0.000120997	0.00258848	1.03719	DOWN
LIME1	-1.01143	1.66484	-4.05463	0.000123967	0.00261919	1.01794	DOWN
RNF224	-1.71336	-1.29453	-4.05416	0.000124171	0.00261944	0.865625	DOWN
XKR4	1.54226	1.78544	4.05103	0.000125534	0.00263598	0.997396	UP
DMBT1	-1.16682	-1.70798	-4.04411	0.000128597	0.00268298	0.81959	DOWN
LMX1B	1.92234	-3.7696	4.04366	0.000128797	0.00268468	0.724063	UP
CENPV	1.45108	3.66673	4.03633	0.000132128	0.00272665	0.865333	UP
HSPA7	-1.51698	2.40859	-4.03423	0.000133099	0.00273429	0.953782	DOWN
PBK	1.13448	4.21762	4.02183	0.000138962	0.00280661	0.790871	UP
MAPK4	-1.32071	6.45342	-4.01861	0.000140526	0.00281838	0.742295	DOWN
GPT	-1.15324	1.47403	-4.01859	0.000140535	0.00281838	0.905713	DOWN
DCST1	-1.40784	-2.09667	-4.00678	0.000146414	0.00291064	0.662361	DOWN
NEK2	1.05555	2.89421	4.00351	0.000148083	0.00293235	0.813854	UP
CASZ1	-1.06172	1.54593	-3.99299	0.000153575	0.00299543	0.827495	DOWN
UBQLNL	-1.19927	-0.926749	-3.97385	0.000164077	0.00312791	0.688826	DOWN
WNT4	1.15021	0.175337	3.9684	0.000167192	0.00316082	0.750314	UP
OSMR	-1.09508	6.17724	-3.96338	0.00017011	0.00319213	0.565545	DOWN
WFIKKN1	-1.24565	0.527861	-3.96087	0.000171587	0.00320649	0.717422	DOWN
KLRC2	2.29736	-0.317354	3.95936	0.000172482	0.00321034	0.721339	UP
NHS	-1.12737	2.72614	-3.94936	0.000178523	0.003285	0.684176	DOWN
SPC24	1.00147	3.49776	3.93768	0.000185832	0.00338664	0.569463	UP
MPPED2	1.34276	2.985	3.93591	0.000186969	0.00340462	0.588764	UP
APOL4	1.22694	4.96278	3.92615	0.00019333	0.00348975	0.453358	UP
MYBL2	1.22032	4.67876	3.91292	0.000202292	0.0035917	0.420292	UP
GALNT14	1.17187	0.894314	3.90234	0.000209748	0.0036697	0.550497	UP
TCTEX1D4	-1.4227	-2.64218	-3.89951	0.000211786	0.00368452	0.304597	DOWN
VAX2	1.23546	1.6174	3.89591	0.000214401	0.00371399	0.521506	UP
DLL3	1.80224	4.49292	3.89005	0.000218731	0.00376608	0.354644	UP
ABCC3	-1.58252	5.79209	-3.85436	0.000246973	0.00408546	0.242324	DOWN
TEX38	-1.27885	-2.95505	-3.84703	0.000253192	0.00415544	0.13138	DOWN
ABCA13	-1.90692	1.00229	-3.84679	0.000253394	0.00415544	0.380885	DOWN
CADPS2	-1.08384	4.11825	-3.83574	0.000263055	0.00426776	0.27193	DOWN
SOX4	1.11551	6.55828	3.81505	0.000282105	0.00445618	0.0952359	UP
LINC00643	2.0913	0.58968	3.81273	0.000284325	0.00447876	0.280147	UP
SLC11A1	-1.01152	6.07244	-3.812	0.000285027	0.0044851	0.0861265	DOWN
SOD3	-1.07018	4.01501	-3.79847	0.000298318	0.00459115	0.163007	DOWN
HOXD13	2.17884	0.824905	3.78863	0.000308355	0.00467607	0.203998	UP
RERGL	1.14118	1.1742	3.77709	0.000320533	0.00480325	0.170612	UP
VENTX	-1.16973	1.15088	-3.77439	0.000323452	0.00483415	0.170515	DOWN
SOX11	1.16781	4.9285	3.76872	0.000329654	0.00489471	-0.0411322	UP
FGF14	1.2515	2.96239	3.76678	0.00033181	0.00491389	0.0686892	UP
KLRC3	1.74008	-2.14367	3.75582	0.000344203	0.00505468	0.0701146	UP
HOXA11	1.92656	-0.765263	3.74741	0.000354019	0.00513587	0.0885518	UP
PDE1A	1.02117	2.30093	3.73698	0.000366551	0.00526078	0.0202087	UP
PTPRVP	-1.32775	-0.765476	-3.70167	0.000412222	0.00568667	-0.0772577	DOWN
CNTN6	1.03869	-0.456327	3.69601	0.000420027	0.00576085	-0.0589128	UP
NEUROD1	2.00549	0.735821	3.69371	0.000423242	0.00579653	-0.0737257	UP
CES3	-1.06779	1.05362	-3.6876	0.00043189	0.00587334	-0.0825848	DOWN
SSC5D	-1.26928	2.84465	-3.68306	0.000438424	0.00593306	-0.124102	DOWN
FCGBP	-1.11405	8.75611	-3.67967	0.000443368	0.00597509	-0.303388	DOWN
CRB2	-1.3447	5.53358	-3.67773	0.000446211	0.00599921	-0.298073	DOWN
LMO1	1.48478	1.7369	3.66859	0.000459881	0.00612511	-0.169551	UP
NBAT1	1.47766	-0.731898	3.65587	0.000479572	0.00627777	-0.174332	UP
SNX22	1.11089	4.16252	3.64834	0.000491598	0.0063905	-0.373754	UP
SERPINE1	-1.41436	7.31088	-3.64519	0.00049672	0.00643816	-0.43277	DOWN
GRK1	-1.1576	-1.75347	-3.64504	0.000496962	0.00643816	-0.284028	DOWN
FCGR2C	-1.27109	1.78777	-3.63591	0.000512097	0.0065694	-0.237991	DOWN
FGF22	-1.28324	-2.46377	-3.61787	0.000543286	0.00685492	-0.414461	DOWN
GNG4	1.08561	5.03549	3.61625	0.000546162	0.00687216	-0.511079	UP
CLCNKA	-1.30007	-1.98494	-3.61489	0.000548601	0.0068896	-0.385719	DOWN
DCST2	-1.3588	-0.533541	-3.61463	0.000549062	0.0068896	-0.309104	DOWN
COL8A1	-1.84333	4.8306	-3.61273	0.000552486	0.00690272	-0.424831	DOWN
ESR2	-1.48423	-0.107249	-3.60458	0.000567399	0.00701441	-0.327504	DOWN
LAT	-1.01604	-1.10026	-3.60136	0.000573396	0.00704352	-0.360824	DOWN
LPAR4	1.47963	0.618245	3.59367	0.000587971	0.00719536	-0.359386	UP
SIGLEC5	-1.13499	-0.356115	-3.58673	0.000601407	0.00724861	-0.378658	DOWN
MET	-1.66991	3.66498	-3.58252	0.000609703	0.0073004	-0.44663	DOWN
RSPO4	-1.37421	-0.437959	-3.58211	0.000610523	0.00730199	-0.395772	DOWN
GADD45G	1.05638	4.06564	3.58042	0.00061388	0.00731578	-0.570918	UP
PDX1	1.87409	-4.62099	3.56988	0.00063527	0.00751899	-0.612657	UP
CDRT4	-1.0491	-1.8721	-3.56602	0.000643275	0.00758271	-0.498778	DOWN
NPPA	1.80305	0.666372	3.56358	0.000648385	0.0076311	-0.448893	UP
CLDN9	-1.30486	-1.4305	-3.55595	0.00066464	0.00777417	-0.505649	DOWN
TMEM132B	1.48605	4.25351	3.54937	0.000678932	0.00789476	-0.679585	UP
NKAIN1	1.52421	2.14428	3.53728	0.000706004	0.00812029	-0.571422	UP
KCNIP4	1.23058	3.07282	3.53557	0.00070992	0.00814886	-0.632132	UP
CES4A	-1.05584	1.11237	-3.53358	0.000714482	0.00817649	-0.522711	DOWN
COL7A1	-1.14785	3.41448	-3.52663	0.000730679	0.00830098	-0.60972	DOWN
RUFY4	-1.42038	-1.11345	-3.50419	0.000785384	0.0087589	-0.629744	DOWN
MEX3B	1.04708	2.02903	3.50284	0.000788817	0.00878427	-0.654674	UP
VASN	-1.078	4.55835	-3.49953	0.000797226	0.00885193	-0.775634	DOWN
RGL3	-1.08003	2.17662	-3.49903	0.000798501	0.00886176	-0.639468	DOWN
DRD4	-1.01365	-0.0823735	-3.49433	0.000810648	0.00892261	-0.627176	DOWN
RORB	-1.25626	3.69733	-3.49078	0.00081992	0.00899423	-0.72751	DOWN
MYCBPAP	-1.14672	1.0715	-3.49047	0.000820721	0.00899868	-0.642563	DOWN
GRIA4	1.43208	4.87424	3.48497	0.000835299	0.00910152	-0.897543	UP
SOD2	-1.1183	10.1677	-3.48139	0.000844926	0.00917567	-0.863509	DOWN
LTA	-1.05932	-1.67096	-3.46576	0.000888192	0.00944721	-0.749265	DOWN
TOP2A	1.09154	6.16877	3.46253	0.000897387	0.0095361	-0.978067	UP
PLIN4	-1.16329	0.661354	-3.45791	0.000910699	0.00963259	-0.728108	DOWN
SLC16A12	1.20487	-0.861528	3.43563	0.000977577	0.0101328	-0.786426	UP
HSD17B6	-1.02122	2.23269	-3.4349	0.000979824	0.0101468	-0.822722	DOWN
ADAM29	1.52929	-4.6848	3.43083	0.000992571	0.0102416	-0.972055	UP
CDCP1	-1.13641	3.51654	-3.42857	0.000999701	0.0102779	-0.898065	DOWN
HAND2	1.97585	-0.422619	3.4232	0.00101686	0.0104166	-0.824766	UP
GPRC5A	-1.36309	3.03889	-3.41647	0.00103875	0.0105837	-0.900141	DOWN
FOSL1	-1.20411	2.89393	-3.41141	0.00105551	0.0107066	-0.911192	DOWN
KBTBD12	-1.31339	1.22492	-3.40623	0.0010729	0.0108192	-0.876519	DOWN
CYP4F11	-1.03354	2.40152	-3.39402	0.00111506	0.011064	-0.942251	DOWN
CFB	-1.0686	1.90965	-3.38478	0.00114794	0.0112773	-0.952307	DOWN
TTC34	-1.13526	0.679451	-3.37861	0.00117043	0.011434	-0.944793	DOWN
SLC26A9	-1.19297	-0.951644	-3.3637	0.00122649	0.0118093	-0.989441	DOWN
RHCE	-1.11116	1.0186	-3.34634	0.00129493	0.0122101	-1.03808	DOWN
CCER2	1.32515	1.03623	3.33909	0.00132458	0.0124381	-1.08115	UP
OTP	1.57538	0.716021	3.32486	0.00138464	0.0127911	-1.11394	UP
FOXH1	-1.08126	-2.88468	-3.31861	0.00141179	0.0129447	-1.1854	DOWN
CA14	1.06144	3.59056	3.31132	0.00144415	0.0131487	-1.31316	UP
SLC34A3	-1.456	-1.66671	-3.30747	0.0014615	0.0132431	-1.15907	DOWN
LYPD6B	1.38183	-2.24319	3.29059	0.00153993	0.0137243	-1.18067	UP
ESPNL	-1.81978	-0.338776	-3.28743	0.00155504	0.0138176	-1.1817	DOWN
HTR4	-1.39712	-2.28814	-3.27705	0.00160564	0.0141274	-1.26165	DOWN
NLRP11	1.64996	-2.85629	3.2761	0.00161039	0.0141582	-1.23339	UP
P2RX3	1.07889	-3.22148	3.26588	0.00166186	0.0144821	-1.28173	UP
LINC00894	-1.00275	0.438159	-3.26338	0.00167471	0.0145259	-1.25037	DOWN
XKR5	1.15758	-1.40789	3.26329	0.00167518	0.0145259	-1.24229	UP
GJB3	-1.54865	-2.63629	-3.26169	0.00168346	0.0145699	-1.32236	DOWN
TRIM63	-1.81647	-2.57299	-3.25852	0.00169993	0.0146623	-1.33362	DOWN
DDIT4L	-1.41621	3.77335	-3.21886	0.00191937	0.0159974	-1.4926	DOWN
CALML6	-1.31869	-1.80391	-3.21598	0.00193632	0.01608	-1.38709	DOWN
TNFSF14	-1.44811	0.855733	-3.2101	0.00197131	0.0162973	-1.39311	DOWN
FSCN2	-1.09095	-1.57621	-3.19982	0.00203391	0.0166734	-1.41737	DOWN
RAB33A	1.10862	2.81441	3.18836	0.00210596	0.0170651	-1.58602	UP
LINC01098	1.25915	-5.27004	3.18299	0.00214048	0.0172366	-1.60137	UP
TMEM229A	-1.666	1.3984	-3.18051	0.00215662	0.0173276	-1.48084	DOWN
TLX1	1.93014	-2.03331	3.17897	0.00216674	0.0173804	-1.45749	UP
LMO3	-1.03439	5.58322	-3.17692	0.0021802	0.0174411	-1.76659	DOWN
IGF2BP3	1.08839	2.65697	3.17412	0.00219877	0.017524	-1.60944	UP
CYP11A1	-1.33688	-0.0578799	-3.17316	0.00220514	0.0175624	-1.47447	DOWN
CXCL5	-1.88874	1.52275	-3.15306	0.00234302	0.0183903	-1.55253	DOWN
CD274	-1.03077	2.37117	-3.13289	0.00248943	0.0191985	-1.64748	DOWN
TFCP2L1	-1.55828	2.66461	-3.13192	0.00249668	0.0192186	-1.6537	DOWN
HOXD3	1.2205	-1.91782	3.12834	0.00252363	0.0193606	-1.5839	UP
CCDC114	-1.0515	-0.430416	-3.12589	0.00254217	0.0194503	-1.59129	DOWN
PPL	-1.29004	2.95043	-3.1246	0.00255201	0.0194994	-1.69306	DOWN
KCNQ2	1.36122	5.09441	3.11252	0.00264591	0.0199954	-1.95702	UP
LEMD1	1.16009	-0.770137	3.10832	0.00267936	0.0201678	-1.64518	UP
MYT1	1.51064	2.18817	3.09796	0.00276335	0.020648	-1.79129	UP
CAPN12	-1.08223	-1.85711	-3.09753	0.00276695	0.0206564	-1.67127	DOWN
ANO9	-1.10272	-1.91124	-3.09672	0.00277357	0.0206854	-1.67461	DOWN
COL17A1	-1.01976	-1.73718	-3.09537	0.00278475	0.0207348	-1.67375	DOWN
KRT75	-2.15115	-0.268916	-3.09113	0.00282008	0.0209295	-1.67528	DOWN
CD300E	-1.56286	0.20906	-3.09012	0.00282859	0.0209473	-1.68539	DOWN
DOK6	1.10258	1.46268	3.07792	0.00293295	0.0215077	-1.79065	UP
TECRL	1.24905	-5.56173	3.07118	0.00299216	0.0217616	-1.86702	UP
SUSD5	1.22132	1.72346	3.06907	0.00301089	0.0218347	-1.8291	UP
LHX1	1.75906	-3.13451	3.06782	0.00302211	0.0218865	-1.74422	UP
HAP1	-1.09021	4.72058	-3.06621	0.00303655	0.0219492	-1.9963	DOWN
IL22RA1	-1.25083	-2.55199	-3.06595	0.00303885	0.0219519	-1.7691	DOWN
ITGA3	-1.04455	6.30211	-3.06145	0.00307955	0.0221838	-2.10295	DOWN
C2orf80	1.21725	2.73355	3.05736	0.00311704	0.0223606	-1.9337	UP
AHNAK2	-1.44776	3.78943	-3.05633	0.00312652	0.0224003	-1.92429	DOWN
MDGA2	1.49441	-0.184014	3.05277	0.00315956	0.0225802	-1.80149	UP
CDH7	1.57417	-2.01142	3.04654	0.00321813	0.0228066	-1.78383	UP
TNNI1	1.13795	-3.36802	3.04076	0.00327339	0.0231131	-1.81936	UP
GCNT1	-1.07533	2.63879	-3.04072	0.00327373	0.0231131	-1.89938	DOWN
SFN	-1.28917	-0.134643	-3.03997	0.00328097	0.0231355	-1.8066	DOWN
HSF4	-1.08144	2.62639	-3.03758	0.00330419	0.0232776	-1.90774	DOWN
SRRM4	1.55779	0.989302	3.03411	0.003338	0.0234298	-1.89164	UP
ATP6V0A4	1.66938	-2.55205	3.03368	0.00334225	0.0234298	-1.81602	UP
CA10	1.67547	2.12502	3.02574	0.00342116	0.0239019	-1.97912	UP
HOXD8	1.38834	1.38919	3.02537	0.00342485	0.0239204	-1.92981	UP
DLK1	1.77099	-0.270696	3.02459	0.0034327	0.0239385	-1.87222	UP
COCH	1.14186	0.442927	3.02303	0.00344839	0.0239965	-1.89232	UP
CYP27C1	1.30844	-0.718877	3.0223	0.00345585	0.0240263	-1.86201	UP
MST1L	-1.12478	-0.344578	-3.02095	0.00346951	0.0240771	-1.852	DOWN
DCT	1.16077	1.40656	3.01275	0.00355384	0.0244981	-1.95672	UP
KRT7	-1.2283	0.267355	-3.00854	0.00359787	0.0247133	-1.89421	DOWN
CRABP1	1.71064	-0.197738	3.00346	0.00365169	0.0249759	-1.92684	UP
RASL11B	1.11777	1.73297	3.00281	0.00365868	0.0250162	-1.9995	UP
APOB	-1.55415	-1.95879	-3.00192	0.00366819	0.0250586	-1.90294	DOWN
COL26A1	1.23834	0.129	2.99804	0.00370999	0.0252457	-1.94635	UP
TRIM71	1.18749	-0.716978	2.98868	0.00381261	0.0257898	-1.94381	UP
NLRP6	-1.26183	-2.36612	-2.98166	0.00389128	0.0261201	-1.95538	DOWN
TAC4	1.02824	-2.18382	2.97987	0.00391159	0.0262178	-1.94272	UP
HAS1	-1.07426	-1.45974	-2.96871	0.00404032	0.0267809	-1.96958	DOWN
TMEM196	1.45283	-0.663429	2.96696	0.0040609	0.0268704	-2.00104	UP
XAF1	-1.09896	3.08415	-2.96457	0.00408906	0.0270047	-2.12054	DOWN
HAS3	-1.01375	2.24759	-2.96123	0.00412885	0.0271699	-2.0827	DOWN
ADAM8	-1.04363	3.42072	-2.9609	0.0041328	0.0271812	-2.15641	DOWN
LPIN3	-1.10156	1.77205	-2.95998	0.00414385	0.0272293	-2.06507	DOWN
EPS8L2	-1.0497	3.49722	-2.95223	0.00423767	0.0276463	-2.18566	DOWN
PAPPA	-1.13286	0.311228	-2.95172	0.00424402	0.0276718	-2.03521	DOWN
ZDHHC11B	-1.06936	1.95757	-2.93978	0.00439275	0.0282371	-2.12234	DOWN
CADM2	1.1268	5.3462	2.9257	0.00457427	0.02904	-2.45763	UP
SPOCD1	-1.16324	6.15445	-2.91695	0.00469059	0.0295754	-2.47759	DOWN
SLC35G6	-1.04835	-3.71837	-2.9105	0.00477819	0.0299302	-2.1567	DOWN
COL9A3	1.14611	4.40376	2.9082	0.00480973	0.0300849	-2.4645	UP
SLC1A6	1.71705	-0.752679	2.89643	0.00497423	0.0307623	-2.17139	UP
HOXC9	1.50001	-0.331544	2.89502	0.00499423	0.0308388	-2.18693	UP
HRH2	-1.073	0.298929	-2.88748	0.00510289	0.0313427	-2.19064	DOWN
GLYAT	-1.25283	-4.59162	-2.8873	0.00510546	0.0313489	-2.25515	DOWN
GRID2	1.31057	2.39323	2.88398	0.00515387	0.0315271	-2.34954	UP
OBP2A	1.32291	-4.0586	2.88306	0.00516741	0.0315675	-2.18968	UP
CHI3L1	-1.44541	11.2548	-2.8829	0.00516985	0.0315739	-2.47469	DOWN
EVX2	1.30663	-2.2678	2.87235	0.00532724	0.0321897	-2.19244	UP
NEU4	1.15798	3.21794	2.86815	0.00539103	0.0324717	-2.46166	UP
HK3	-1.02909	2.93243	-2.86682	0.00541139	0.0325467	-2.35705	DOWN
CLVS1	1.2048	0.282576	2.86262	0.00547625	0.03282	-2.28324	UP
THNSL2	-1.41921	3.5652	-2.85964	0.00552258	0.0330542	-2.411	DOWN
AC073316.1	-1.1428	-3.65533	-2.8586	0.00553897	0.0330827	-2.26508	DOWN
GOLGA8O	-1.07684	-3.63956	-2.85794	0.00554925	0.0331267	-2.26471	DOWN
GABRP	1.01514	-4.62928	2.85106	0.00565837	0.0335843	-2.28275	UP
CATSPERB	-1.19658	-2.29288	-2.84869	0.00569631	0.033669	-2.2501	DOWN
GABRB3	1.33638	2.69235	2.84614	0.0057375	0.0338071	-2.47254	UP
LBX1	1.5119	-2.69743	2.84281	0.00579157	0.0340515	-2.25808	UP
BNC2	-1.00687	2.33412	-2.84159	0.00581156	0.0341337	-2.38338	DOWN
FGF3	1.16316	-5.59116	2.82101	0.00615794	0.0354853	-2.38503	UP
KIF6	-1.13778	1.66752	-2.82046	0.00616743	0.0355119	-2.4015	DOWN
GLRA2	1.32119	-0.369884	2.82003	0.00617489	0.035538	-2.3627	UP
LHX9	1.43141	1.04031	2.81984	0.00617831	0.0355487	-2.42278	UP
FGF19	1.37978	-5.16388	2.81196	0.00631617	0.0360031	-2.37924	UP
CELSR1	-1.24753	3.48896	-2.8094	0.00636167	0.0361289	-2.53133	DOWN
DCX	1.46592	3.57162	2.80293	0.00647784	0.0364882	-2.66832	UP
EBF3	1.3333	-0.798421	2.80269	0.00648223	0.0364992	-2.38881	UP
CA12	-1.10965	6.16801	-2.80097	0.00651335	0.0366428	-2.77292	DOWN
PCDHB2	1.10716	3.00069	2.80027	0.00652609	0.0366873	-2.60664	UP
GPR39	-1.02067	0.222602	-2.79563	0.00661126	0.0369653	-2.40668	DOWN
GPR17	1.67023	3.03721	2.79132	0.00669113	0.0373126	-2.65026	UP
NKAIN4	1.39114	5.35255	2.78603	0.00679057	0.0376717	-2.81005	UP
KLRC4	1.29867	-3.56323	2.781	0.00688625	0.0380356	-2.39937	UP
GRP	1.0781	-2.36172	2.77757	0.00695232	0.0383262	-2.40447	UP
LINC00299	-1.12303	-0.186688	-2.77536	0.00699504	0.0385337	-2.43766	DOWN
STEAP2	-1.03259	2.82062	-2.77231	0.00705459	0.0387772	-2.58063	DOWN
LCN12	-1.37329	-0.347092	-2.76855	0.00712855	0.0390517	-2.44402	DOWN
FRRS1L	1.19097	2.59903	2.75958	0.00730792	0.0397854	-2.66949	UP
DTHD1	-1.62756	-0.311586	-2.75525	0.0073958	0.0400531	-2.46985	DOWN
CD207	1.18733	-2.00727	2.75187	0.00746532	0.0403635	-2.46758	UP
TAGLN3	1.19708	4.46978	2.75169	0.00746908	0.0403635	-2.86249	UP
NWD1	-1.07617	2.91392	-2.74997	0.00750457	0.0404755	-2.63863	DOWN
HCAR3	-1.2396	-3.24687	-2.74483	0.00761175	0.0408574	-2.4896	DOWN
LTF	-2.08246	7.45138	-2.74004	0.00771296	0.0412168	-2.92582	DOWN
MSL3P1	-1.41402	-3.60621	-2.73983	0.00771742	0.041226	-2.51187	DOWN
SERPINI2	-1.0247	-0.374379	-2.73808	0.00775457	0.0413662	-2.51795	DOWN
C6orf223	-1.167	-1.43058	-2.73009	0.00792684	0.0419899	-2.50868	DOWN
PCDH15	1.42093	1.47228	2.72592	0.00801826	0.042297	-2.66976	UP
GLYATL1	-1.2732	-2.27021	-2.72228	0.0080987	0.0426225	-2.52281	DOWN
MUC3A	-1.06791	-0.878117	-2.71668	0.00822406	0.0431129	-2.54855	DOWN
DLX3	1.09404	-3.41157	2.71648	0.00822861	0.0431169	-2.53582	UP
MYOM3	-1.09001	-2.65455	-2.71376	0.00829009	0.0433338	-2.5429	DOWN
GALNT5	-1.51604	1.57026	-2.69799	0.00865495	0.0447427	-2.67668	DOWN
CXCL14	-1.38169	5.92321	-2.69776	0.00866056	0.044751	-3.01107	DOWN
HPD	-1.0128	1.52273	-2.69435	0.00874143	0.0449554	-2.69494	DOWN
SLC4A11	-1.13301	2.4432	-2.69384	0.00875345	0.0449969	-2.73858	DOWN
NDNF	-1.07705	1.74429	-2.69053	0.00883279	0.045281	-2.71164	DOWN
FERMT1	1.01623	3.52575	2.68971	0.00885262	0.045356	-2.9248	UP
CD177	-1.53112	-3.19203	-2.67783	0.00914293	0.0463293	-2.62742	DOWN
FBN3	1.27577	1.53359	2.67762	0.00914818	0.0463295	-2.782	UP
FABP4	1.26858	-1.1606	2.67624	0.00918252	0.0464369	-2.66379	UP
KCTD19	-1.06272	-1.73772	-2.67376	0.00924449	0.0466422	-2.62789	DOWN
CACNG1	1.0239	-1.35348	2.67086	0.00931755	0.0469014	-2.66475	UP
AGAP2	1.00638	4.87336	2.67085	0.00931764	0.0469014	-3.07853	UP
KCND2	1.14119	3.93993	2.66705	0.0094141	0.0471907	-3.02664	UP
ESRP1	1.2123	-3.38409	2.66343	0.00950662	0.0474851	-2.64658	UP
LHX5	1.47331	-3.40809	2.65993	0.00959712	0.0477695	-2.65378	UP
LMNTD1	-1.22067	-1.22949	-2.64501	0.00999122	0.0491506	-2.6962	DOWN
CLIC6	1.13632	-0.221146	2.64055	0.0101119	0.049588	-2.77941	UP
NDST4	1.34196	-4.13883	2.63821	0.0101756	0.0497793	-2.70295	UP
