# Supplementary material for: DNA5mC Regulator-Mediated Molecular Clusters and Tumor Microenvironment Signatures in Glioblastoma
Source: Front Cell Dev Biol. 2022 Nov 8;10:1055567. doi: 10.3389/fcell.2022.1055567 (PMC9679379; doi:10.3389/fcell.2022.1055567)
Supplement: Supplementary file 4 [file Table1.XLSX]

## Sheet: Sheet1
TCGA-GBM clinical information statistics in this study
Survial
OS	status_0	49
	status_1	94
Age
	Age>60	72
	Age<=60	71
Gender
	Female	51
	Male	92
Histology
	glioblastoma	143
Grade
	G4	143
IDH.status
	Mutant	10
	WT	130
X1p19q.codel
	non-codel	138
	UN	5
IDH.codel.sybtype
	IDHmut-non-codel	8
	IDHwt	127
	UN	7
